# Supplementary material for: Five-coordinate iridium(iii) complex with ΔΛ chirality
Source: Royal Society of Chemistry journal article supplement (doi:10.1039/d1dt01960k), 2021-01-01
Supplement: d1dt01960k1.pdf [file d1dt01960k1.pdf]

## Supporting Information

### Five-Coordinate Iridium(III) Complex with $\Delta\Delta$ Chirality

Kazuyoshi Takimoto,<sup>†</sup> Yutaka Watanabe,<sup>†</sup> Jun Yoshida,<sup>‡</sup> and Hisako Sato<sup>†\*</sup>

<sup>†</sup>Graduate School of Science and Engineering, Ehime University, 2-5 Bunkyo-chou, Matsuyama, Ehime 790-8577, Japan

<sup>‡</sup>Department of Chemistry, College of Humanities & Sciences, Nihon University, 3-25-40 Sakurajosui, Setagaya-ku, Tokyo 156-8550, Japan

\*Corresponding authors: Hisako Sato

#### Table of contents

1. NMR and MS spectra of [Ir(2-Bubzq)<sub>2</sub>Cl]
2. X-ray analysis data of [Ir(2-Bubzq)<sub>2</sub>Cl]
3. Optical resolution of [Ir(2-Bubzq)<sub>2</sub>Cl]
4. Thermal stability of [Ir(2-Bubzq)<sub>2</sub>Cl]
5. Experimental and calculated VCD and IR data of [Ir(2-Bubzq)<sub>2</sub>Cl]
6. X-ray analysis of [Ir(2-Bubzq)<sub>2</sub>(EtOH)Cl]
7. Solvent effects of [Ir(2-Bubzq)<sub>2</sub>Cl]
8. Reaction with carbon monoxide
9. Reaction with 1,10-phenanthroline
10. References

# 1. NMR and MS spectra of [Ir(2-Bubzq)<sub>2</sub>Cl]

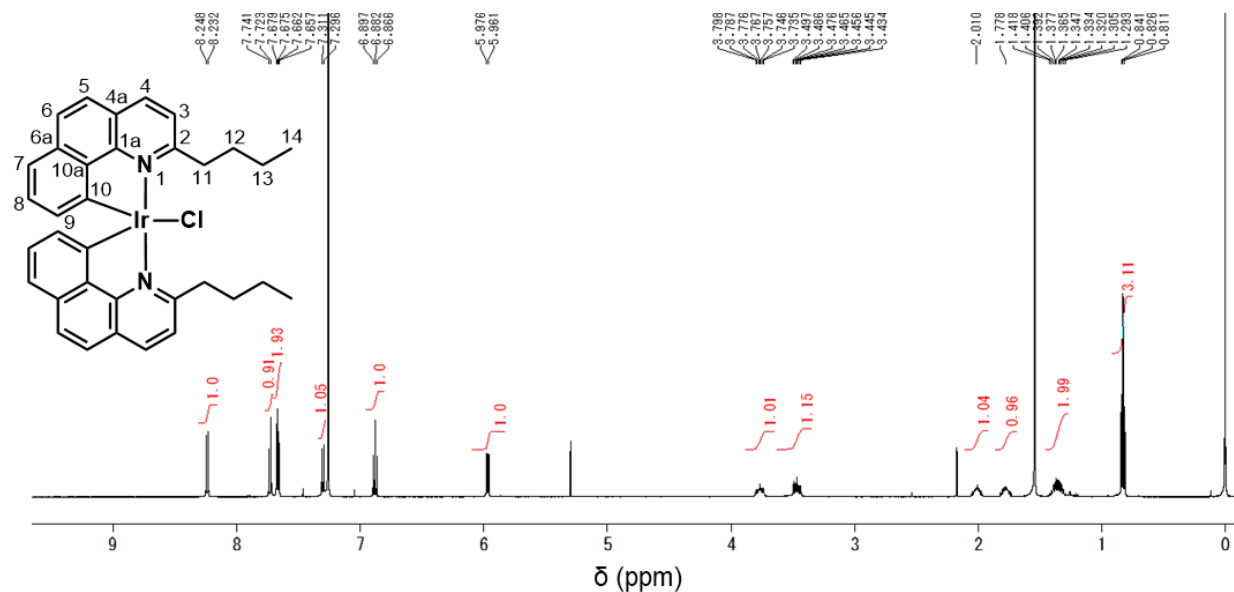

Figure S1. <sup>1</sup>H NMR spectrum of [Ir(2-Bubzq)<sub>2</sub>Cl] in CDCl<sub>3</sub> (500 MHz, 27 °C).

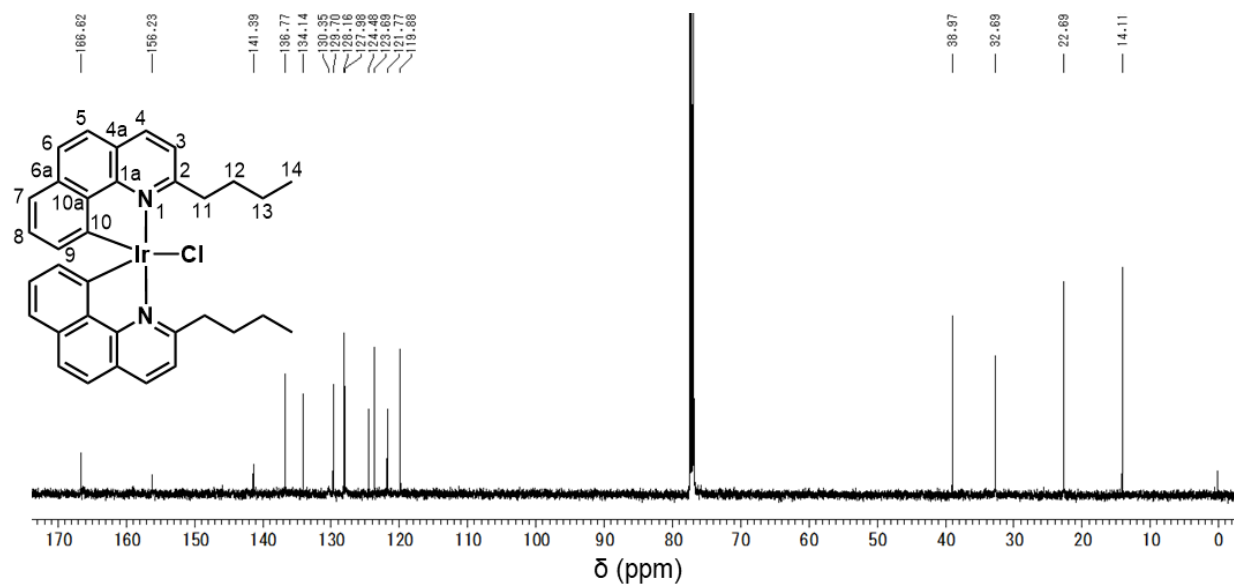

Figure S2. <sup>13</sup>C NMR spectrum [Ir(2-Bubzq)<sub>2</sub>Cl] in CDCl<sub>3</sub> (126 MHz, 27 °C).

[ Mass Spectrum ]  
Data : 20180914001 Date : 14-Sep-2018 13:49  
Instrument : MS7000  
Sample : Ir-dimer Bu-bzq  
Note : Matrix:NBA  
Inlet : Direct Ion Mode : FAB+  
Spectrum Type : Normal Ion [MF-Linear]  
RT : 1.50 min Scan# : (10,38) Temp : 3276.7 deg.C  
BP : m/z 154 Int. : 563.00 (5903505)  
Output m/z range : 50 to 2000 Cut Level : 0.00 %

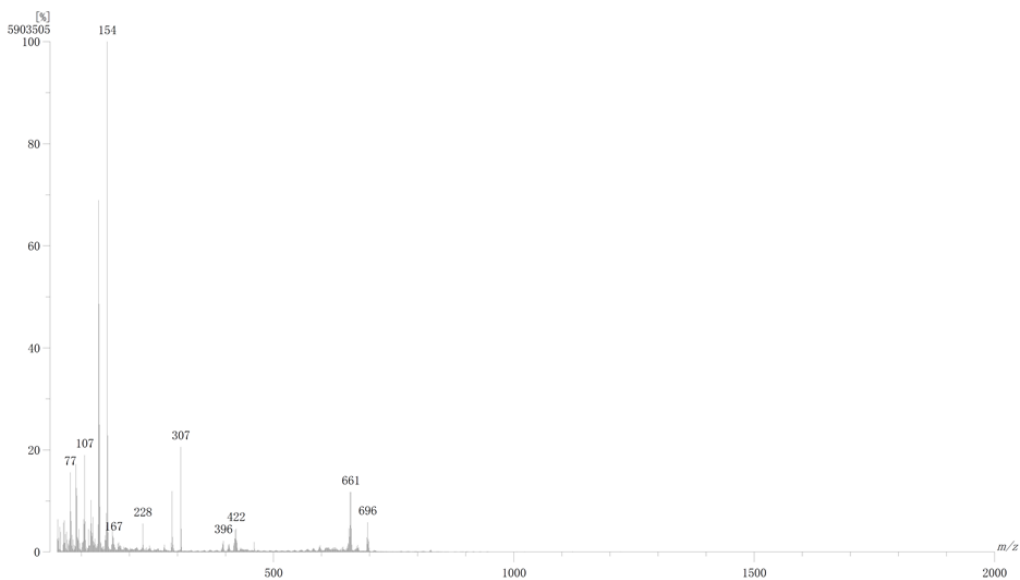

**Figure S3.** LRMS spectrum of  $[\text{Ir}(2\text{-Bubzq})_2\text{Cl}]$  ( $\text{FAB}^+$ , 3-nitrobenzyl alcohol (3-NBA) as a matrix).

## 2. X-ray analysis data

### 2.1 X-Ray analysis of [Ir(2-Bubzq)<sub>2</sub>Cl]

**Table S1.** Selected bond distances (Å) and angles (deg) of [Ir(2-Bubzq)<sub>2</sub>Cl].

| <u>Distance (Å)</u> |             |             |             |
|---------------------|-------------|-------------|-------------|
| Ir1 – C10           | 1.975 (4)   | Ir1 – N1    | 2.057 (3)   |
| Ir1 – C30           | 2.001 (4)   | Ir1 – N2    | 2.112 (3)   |
| Ir1 – Cl1           | 2.4341 (10) |             |             |
| <u>Angle (deg)</u>  |             |             |             |
| C30—Ir1—N21         | 81.26 (16)  | N21—Ir1—Cl1 | 102.27 (10) |
| C30—Ir1—N1          | 91.07 (15)  | N1—Ir1—Cl1  | 86.68 (9)   |
| C10—Ir1—N21         | 92.65 (15)  | C10—Ir1—Cl1 | 119.21 (12) |
| C10—Ir1—N1          | 82.37 (15)  | C30—Ir1—Cl1 | 152.28 (11) |
| C10—Ir1—C30         | 87.75 (16)  |             |             |

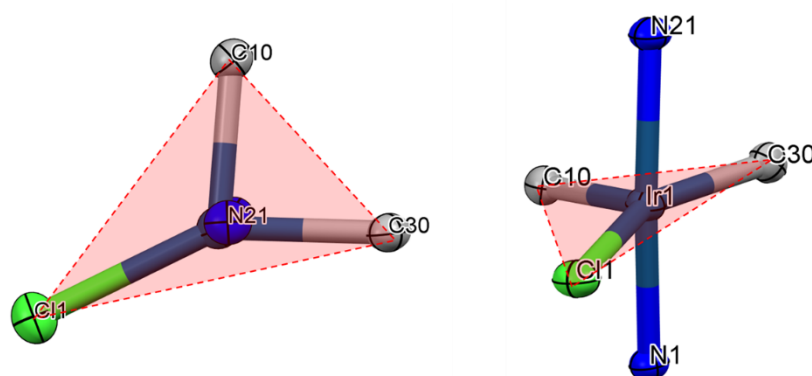

**Figure S4.** The distorted square pyramidal structure is deduced from the X-ray analysis: (left) the top view and (right) the side view. The space between C30 and Cl1 looks like a vacant coordination site.

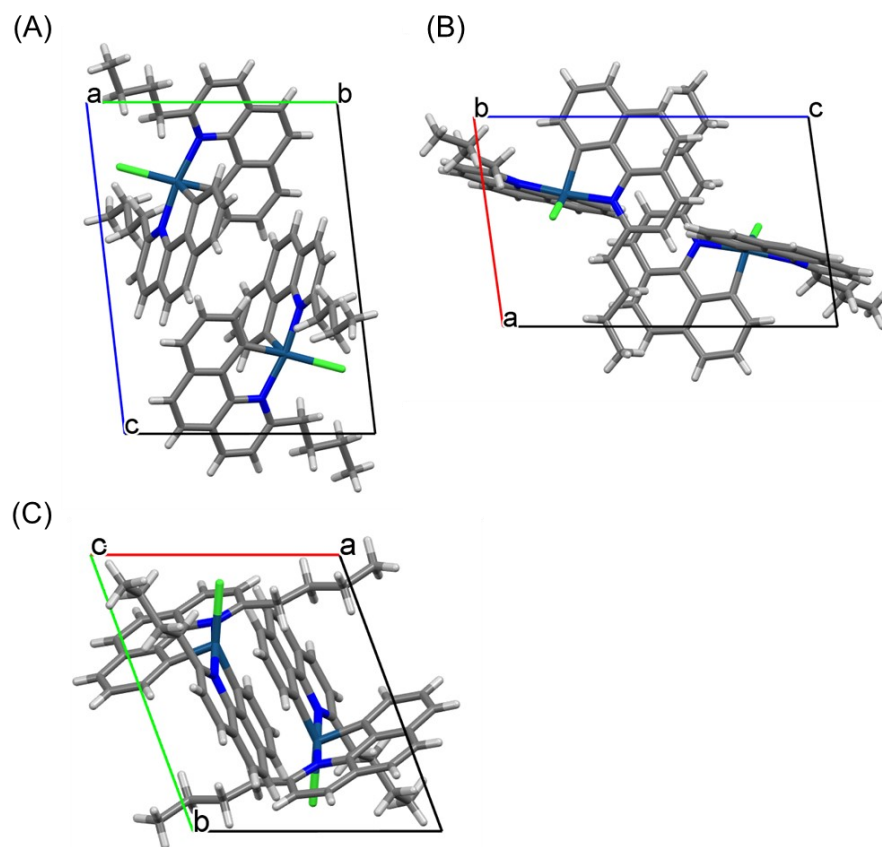

**Figure S5.** Crystal structures of  $[\text{Ir}(\text{2-Bubzq})_2\text{Cl}]$  viewed along (A) the *a* axis, (B) the *b* axis, and (C) the *c* axis, respectively.

**Table S2.** Structure information of [Ir(2-Bubzq)<sub>2</sub>Cl].

| Compound                                                                   | [Ir(2-Bubzq) <sub>2</sub> Cl]                       |
|----------------------------------------------------------------------------|-----------------------------------------------------|
| Recrystallization solvent                                                  | Dichloromethane                                     |
| Formula                                                                    | C <sub>34</sub> H <sub>32</sub> IrN <sub>2</sub> Cl |
| FW                                                                         | 696.29                                              |
| Crystal system                                                             | Triclinic                                           |
| Space group                                                                | <i>P</i> -1                                         |
| <i>a</i> [Å]                                                               | 9.4178 (6)                                          |
| <i>b</i> [Å]                                                               | 11.1107 (8)                                         |
| <i>c</i> [Å]                                                               | 14.0254 (6)                                         |
| $\alpha$ [deg]                                                             | 79.931 (4)                                          |
| $\beta$ [deg]                                                              | 79.001 (4)                                          |
| $\gamma$ [deg]                                                             | 68.307 (6)                                          |
| <i>V</i> [Å <sup>3</sup> ]                                                 | 1329.82 (15)                                        |
| <i>Z</i>                                                                   | 2                                                   |
| $\mu$ [mm <sup>-1</sup> ]                                                  | 10.84                                               |
| Crystal size                                                               | 0.16 × 0.10 × 0.06                                  |
| $R[F^2 > 2\sigma(F^2)]$ , $wR(F^2)$ , <i>S</i>                             | 0.029, 0.074, 1.07                                  |
| $wR_2$                                                                     | 0.074 (all data)                                    |
| No. of measured, independent and observed [ $I > 2\sigma(I)$ ] reflections | 13583, 5254, 4941                                   |
| No. of parameters                                                          | 345                                                 |
| CCDC No.                                                                   | 1974083                                             |

## 2.2 The $\tau$ value of $[\text{Ir}(2\text{-Bubzq})_2\text{Cl}]$

To distinguish whether the geometry of the coordination center is SP or TBP,  $\tau$  value is defined by Addison *et al.* which is the parameters as  $(\beta - \alpha)/60$ , where  $\beta$  and  $\alpha$  ( $\beta > \alpha$ ) are the two greatest bond angles of the coordination center.<sup>S1</sup> The  $\tau$  is zero for an ideal SP geometry, while it is unity for an ideal TBP geometry. As the  $\tau$  of  $[\text{Ir}(2\text{-Bubzq})_2\text{Cl}]$  is 0.31, the iridium ion is in between SP and TBP geometry. The previously reported bis-chelated five-coordinate iridium complex has  $\tau = 0.65$ ,<sup>S2</sup> which means that these structures are classified in between SP and TBP like  $[\text{Ir}(2\text{-Bubzq})_2\text{Cl}]$ .

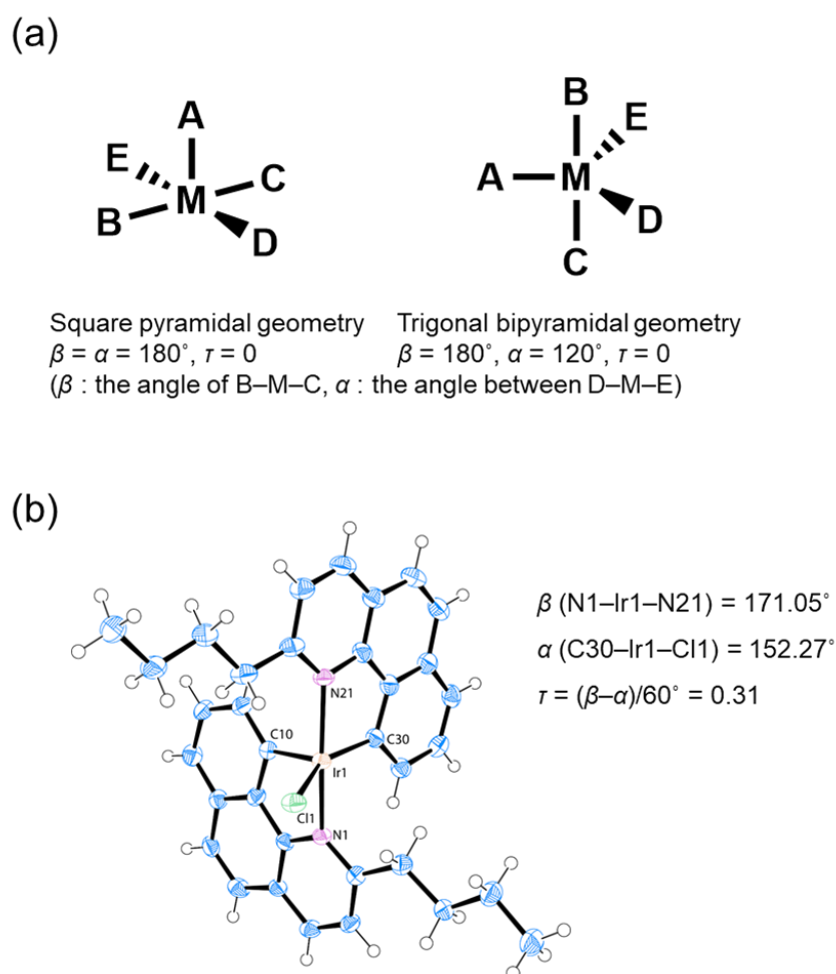

**Figure S6.** (a) Schematic diagram of the extreme values of  $\tau$  in a square pyramidal and trigonal bipyramidal geometry. The  $\tau$  value defined as  $(\beta - \alpha)/60$ , where  $\beta$  and  $\alpha$  ( $\beta > \alpha$ ) are the two greatest bond angles of the coordination center. (b) The molecular structure of  $[\text{Ir}(2\text{-Bubzq})_2\text{Cl}]$  with atom numbering and the  $\tau$  value.

### 3. Optical resolution of [Ir(2-Bubzq)<sub>2</sub>Cl]

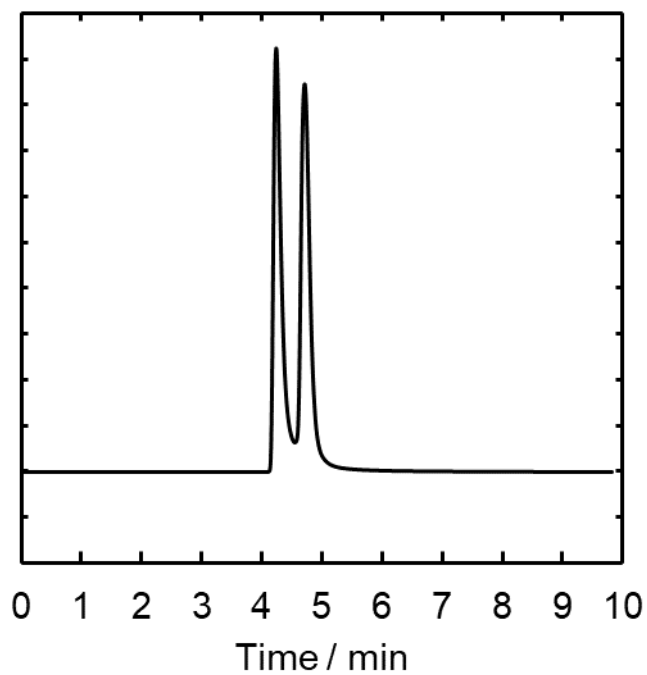

**Figure S7.** The HPLC chromatogram of [Ir(2-Bubzq)<sub>2</sub>Cl] was eluted on a 4 mm (i.d.) × 25 cm chiral column (IG Daicel, Japan) at a flow rate of 0.75 ml/min. The eluent was dichloromethane. The monitoring wavelength was 511 nm. The vertical axis is the intensity in terms of arbitrary unit.



#### 4. Thermal stability of [Ir(2-Bubzq)<sub>2</sub>Cl]

The thermal stability of the enantiomers of [Ir(2-Bubzq)<sub>2</sub>Cl] was examined by heating the toluene solution (3.2 mM) at 70 °C for 8 h. No racemization was confirmed by the measurement of ECD and HPLC.

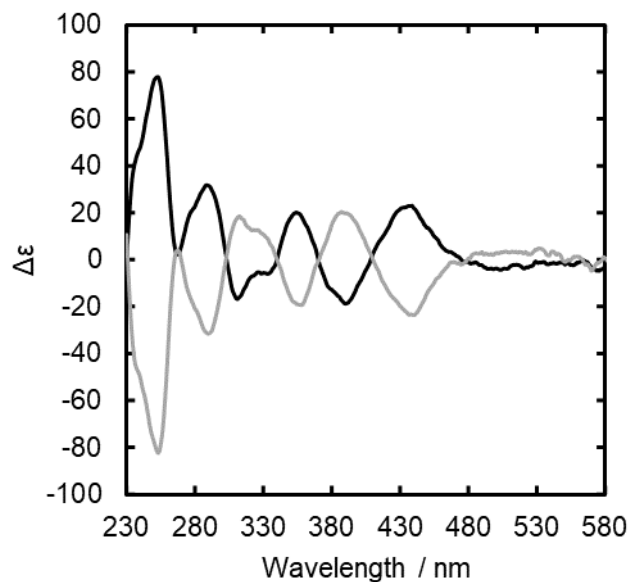

**Figure S8.** The ECD spectra in dichloromethane of [Ir(2-Bubzq)<sub>2</sub>Cl] obtained by the heating experiment. The black and grey curves indicate the fractions collected at 1<sup>st</sup> and 2<sup>nd</sup> elution peaks, respectively.

## 5. Experimental and calculated VCD and IR data of [Ir(2-Bubzq)<sub>2</sub>Cl]

**Table S3.** Assignment of VCD and IR peaks of enantiopure [Ir(2-Bubzq)<sub>2</sub>Cl] in CHCl<sub>3</sub>

| NO | Exp. First peak (optical resolution) / cm <sup>-1</sup> | Calc. C <sub>2</sub> symmetry $\Lambda$ / cm <sup>-1</sup> | assignment                                                                                             |
|----|---------------------------------------------------------|------------------------------------------------------------|--------------------------------------------------------------------------------------------------------|
| 1  | 1628 (-)                                                | 1636 (-) B                                                 | bzq (C-C) stretching                                                                                   |
| 2  | 1594 (+)                                                | 1611 (+) A                                                 | bzq(C-C-C) stretching                                                                                  |
| 3  | 1565/1554 (-)                                           | 1587 (-) B                                                 | bzq(C-C-C) stretching                                                                                  |
| 4  | 1509 (+)                                                | 1519 (+) A                                                 | bzq(C-C-C) stretching, C-H (bzq)                                                                       |
| 5  | 1502 (-)                                                | 1515 (-) B                                                 | bzq(C-C-C) stretching, C-H (bzq)                                                                       |
| 6  | 1431 (+)                                                | 1434 (+) A                                                 | bzq(C-C-C) stretching, C-H (bzq), butyl (C-C) bending                                                  |
| 7  | 1382 (+)                                                | 1391 (+) A                                                 | butyl (CH <sub>3</sub> ) bending, butyl (C-C-C) stretching butyl (CH <sub>2</sub> ) bending            |
| 8  | 1375 (-)                                                | 1389 (-) B                                                 | butyl (CH <sub>3</sub> ) bending, butyl (C-C-C) stretching butyl (CH <sub>2</sub> ) bending (in-phase) |
| 9  | 1303 (+)                                                | 1337 (+) B                                                 | butyl (CH <sub>2</sub> ) bending (out of phase), bzq(C-C-C) stretching                                 |
| 10 | 1214 (+)                                                | 1226 (+) B                                                 | bzq and butyl CH bending                                                                               |
| 11 | 1197/1190 (-/+)                                         | 1194 (+) B                                                 | bzq C-H bending                                                                                        |
| 12 | 1140 (-)                                                | 1152 (-) B                                                 | bzq C-H bending                                                                                        |
| 13 | 1117 (+)                                                | 1118 (+) A                                                 | bzq CH bending                                                                                         |
| 14 | 1107 (-)                                                | 1112 (-) B                                                 | butyl CH bending                                                                                       |
| 15 | 1099(+)                                                 | 1106 (+) A                                                 | butyl C-C-C bending                                                                                    |
| 16 | 1036 (-)                                                | 1038 (-) B                                                 | butyl C-C -C bending, bzq C-C bending                                                                  |

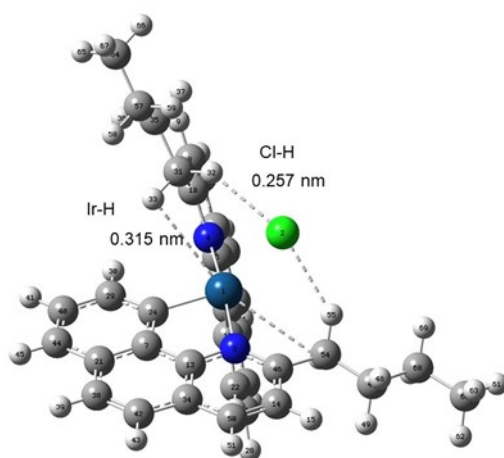

**Figure S9.** The optimized structure of  $\Lambda$ -[Ir(2-Bubzq)<sub>2</sub>Cl] in CHCl<sub>3</sub> medium. The complex was assumed to take  $C_2$  symmetry.

## 6. X-ray analysis of $[\text{Ir}(\text{2-Bubzq})_2(\text{EtOH})\text{Cl}]$

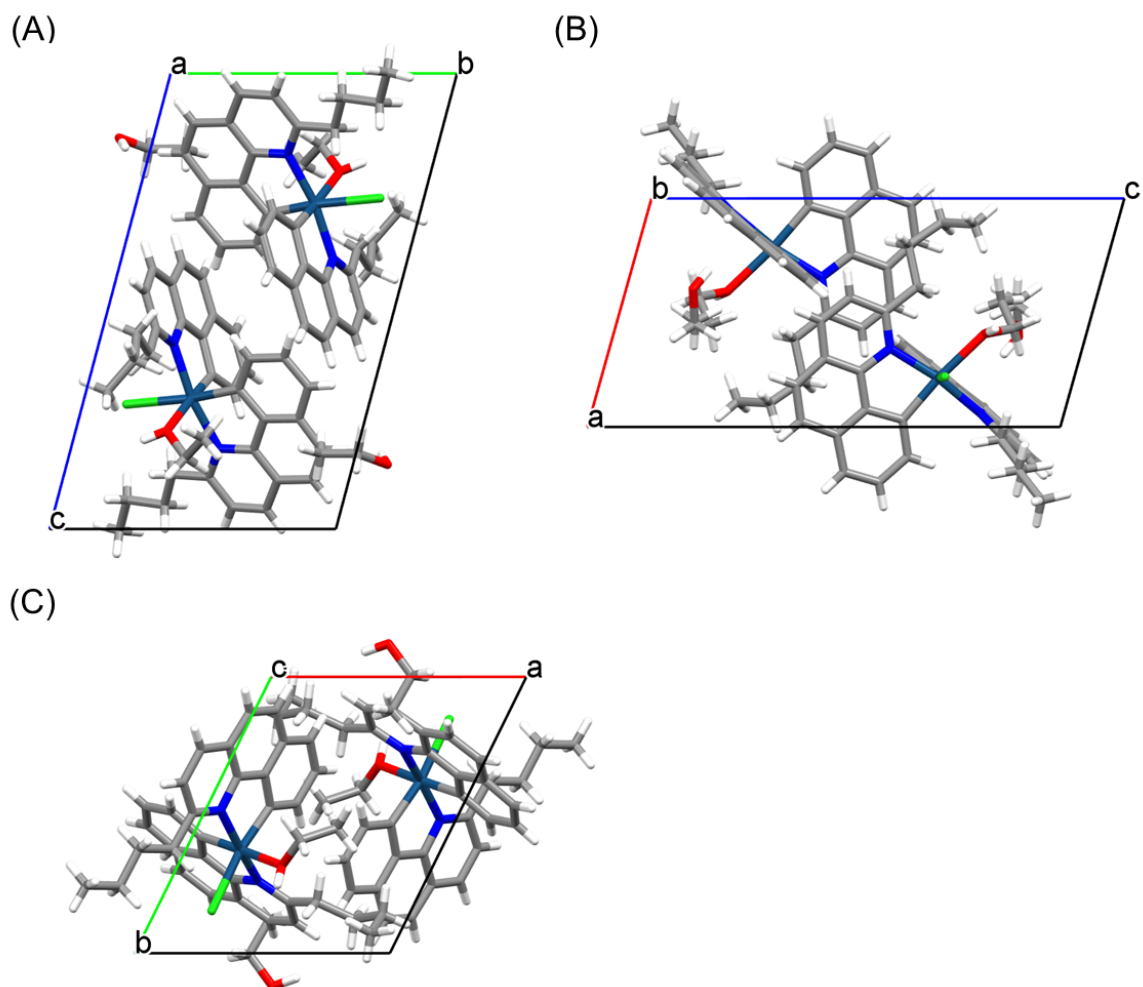

**Figure S10.** Crystal structures of  $[\text{Ir}(\text{2-Bubzq})_2(\text{EtOH})\text{Cl}]$  viewed along (A) the  $a$  axis, (B) the  $b$  axis, and (C) the  $c$  axis, respectively.

**Table S4.** Structure information of [Ir(2-Bubzq)<sub>2</sub>(EtOH)Cl].

| Compound                                                                   | [Ir(2-Bubzq) <sub>2</sub> (EtOH)Cl]                        |
|----------------------------------------------------------------------------|------------------------------------------------------------|
| Recrystallization solvent                                                  | Ethanol                                                    |
| Formula                                                                    | C <sub>36</sub> H <sub>38</sub> IrN <sub>2</sub> OCl, EtOH |
| FW                                                                         | 788.40                                                     |
| Crystal system                                                             | Triclinic                                                  |
| Space group                                                                | <i>P</i> -1                                                |
| <i>a</i> [Å]                                                               | 9.3674 (4)                                                 |
| <i>b</i> [Å]                                                               | 11.2876 (5)                                                |
| <i>c</i> [Å]                                                               | 17.3082 (6)                                                |
| $\alpha$ [deg]                                                             | 99.175 (3)                                                 |
| $\beta$ [deg]                                                              | 100.384 (3)                                                |
| $\gamma$ [deg]                                                             | 113.623 (4)                                                |
| <i>V</i> [Å <sup>3</sup> ]                                                 | 1593.84 (12)                                               |
| <i>Z</i>                                                                   | 2                                                          |
| $\mu$ [mm <sup>-1</sup> ]                                                  | 4.310                                                      |
| Crystal size                                                               | 0.04 × 0.04 × 0.02                                         |
| $R[F^2 > 2\sigma(F^2)]$ , $wR(F^2)$ , <i>S</i>                             | 0.039, 0.072, 1.05                                         |
| $wR_2$                                                                     | 0.072 (all data)                                           |
| No. of measured, independent and observed [ $I > 2\sigma(I)$ ] reflections | 14272, 7672, 6817                                          |
| No. of parameters                                                          | 408                                                        |
| CCDC No.                                                                   | 2085213                                                    |

## 7. Solvent effects of [Ir(2-Bubzq)<sub>2</sub>Cl]

### 7.1 Experimental and calculated UV-vis spectra of [Ir(2-Bubzq)<sub>2</sub>Cl]

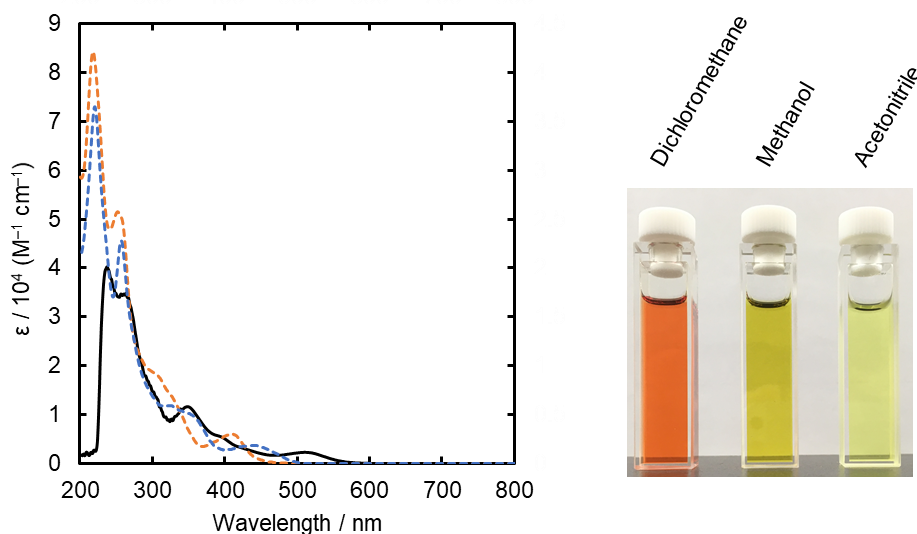

**Figure S11.** The experimental UV-vis spectra of [Ir(2-Bubzq)<sub>2</sub>Cl] in dichloromethane ( $5.9 \times 10^{-5}$  M), methanol ( $4.4 \times 10^{-5}$  M), and acetonitrile ( $5.0 \times 10^{-5}$  M). The black solid, blue dotted and orange dotted lines indicated dichloromethane, methanol, and acetonitrile, respectively.

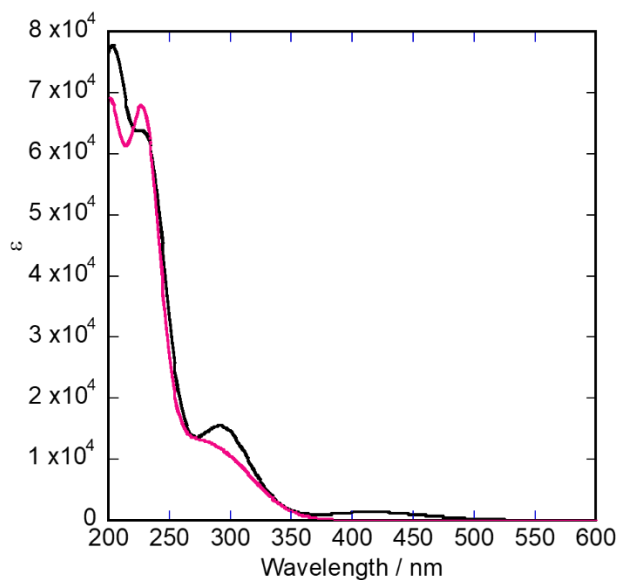

**Figure S12.** Calculated UV-vis spectra by TDDFT using the LC-BLYP functional. The black and red show dichloromethane and ethanol solvent, respectively. At the spectral edge of 410 nm, the HOMO-LUMO transition is assigned in CH<sub>2</sub>Cl<sub>2</sub> solvent. The calculated UV-vis spectrum in ethanol is calculated as a six-coordination with an ethanol molecule.

## 7.2 The experimental and calculated VCD and IR spectra of [Ir(2-Bubzq)<sub>2</sub>Cl]

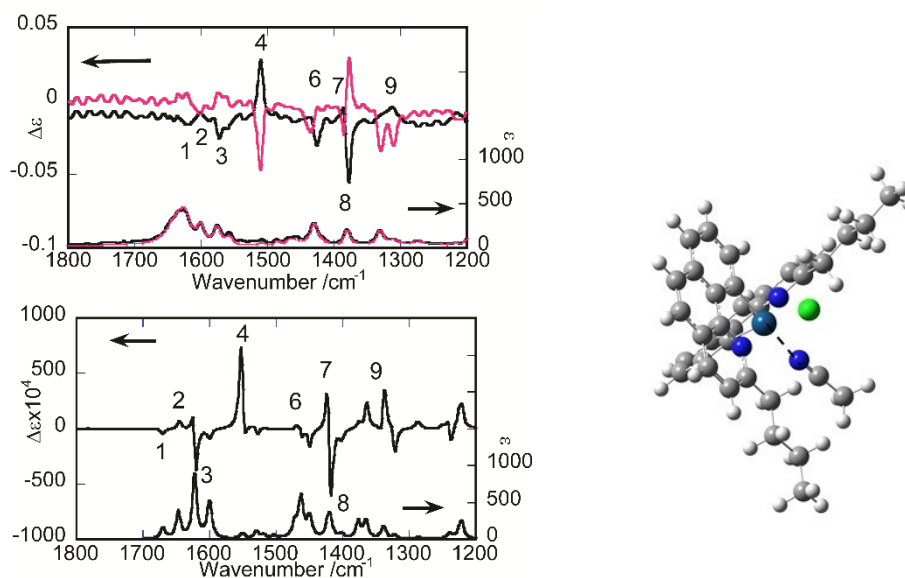

**Figure S13.** (Upper left) The observed IR (lower) and VCD (upper) spectra of enantiopure [Ir(2-Bubzq)<sub>2</sub>Cl] in CD<sub>3</sub>CN. The black and red curves indicate the optically resolved 1<sup>st</sup> and 2<sup>nd</sup> elution peaks, respectively. The baseline correction was performed for the VCD and IR spectra by subtracting the solvent contribution. (Lower left) the DFT calculation of IR and VCD spectra for an enantiopure six-coordinate Ir(III) complex,  $\Lambda$ -[Ir(2-Bubzq)<sub>2</sub>(CH<sub>3</sub>CN)Cl], in CH<sub>3</sub>CN medium. The scale factor was not included in the calculation. The numbers indicate assignments in VCD bands. (Right) The optimized structure of  $\Lambda$ -[Ir(2-Bubzq)<sub>2</sub>(CH<sub>3</sub>CN)Cl].

## 8. Reaction with carbon monoxide

### 8.1 Reaction of [Ir(2-Bubzq)<sub>2</sub>Cl] with carbon monoxide

A solution of [Ir(2-Bubzq)<sub>2</sub>Cl] (29.0 μmol) in CH<sub>2</sub>Cl<sub>2</sub> was bubbled by carbon monoxide (CO) for 1 minute. After removal of volatile materials by evaporation under reduced pressure, the residue was washed by *n*-hexane. [Ir(2-Bubzq)<sub>2</sub>(CO)Cl] was obtained as a white solid (28.8 μmol, Yield 99%). <sup>1</sup>H NMR (500 MHz; CDCl<sub>3</sub>) 0.98 (3H, t, *J* = 7.5 Hz), 1.02 (3H, t, *J* = 7.5 Hz), 1.62 (4H, m), 1.96 (2H, m), 2.06 (1H, m), 2.12 (1H, m), 3.67 (2H, m), 4.12 (1H, m), 4.24 (1H, m), 6.00 (1H, d, *J* = 7.5 Hz), 6.15 (1H, d, *J* = 7.5 Hz), 6.95 (1H, t, *J* = 7.5 Hz), 6.98 (1H, t, *J* = 7.5 Hz), 7.31 (1H, d, *J* = 7.5 Hz), 7.35 (1H, d, *J* = 7.5 Hz), 7.54 (1H, d, *J* = 8.5 Hz), 7.63 (1H, d, *J* = 8.5 Hz), 7.65 (1H, d, *J* = 8.5 Hz), 7.69 (2H, d, *J* = 8.5 Hz), 7.71 (1H, d, *J* = 8.5 Hz), 8.26 (1H, d, *J* = 8.5 Hz), 8.35 (1H, d, *J* = 8.5 Hz); <sup>13</sup>C NMR (126 Hz, CD<sub>2</sub>Cl<sub>2</sub>) 14.16, 14.30, 22.62, 22.70, 32.37, 33.81, 40.32, 44.19, 121.38, 122.36, 122.44, 124.11, 124.15, 124.54, 126.20, 126.52, 127.74, 127.91, 128.70, 129.08, 129.11, 129.15, 134.54, 134.66, 135.92, 138.69, 138.73, 141.80, 141.99, 157.94, 158.40, 161.98, 163.62, 170.65, 176.82; LRMS(FAB<sup>+</sup>, 3-NBA), *m/z* = 696 (M–CO).

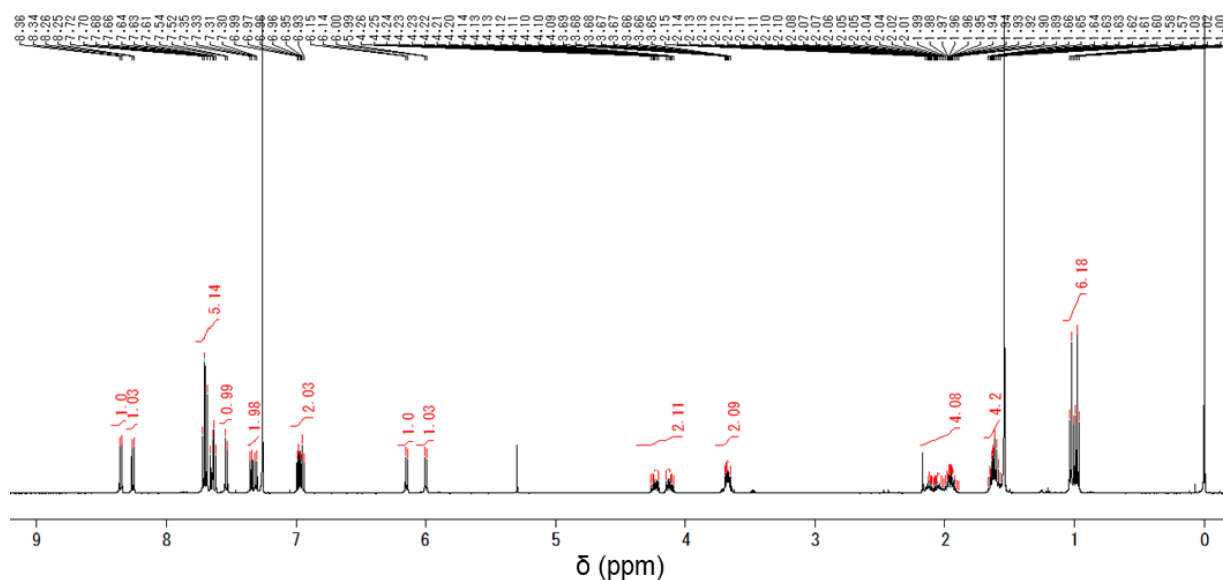

**Figure S14.** <sup>1</sup>H NMR spectrum of [Ir(2-Bubzq)<sub>2</sub>(CO)Cl] in CDCl<sub>3</sub> (500 MHz, 27 °C).



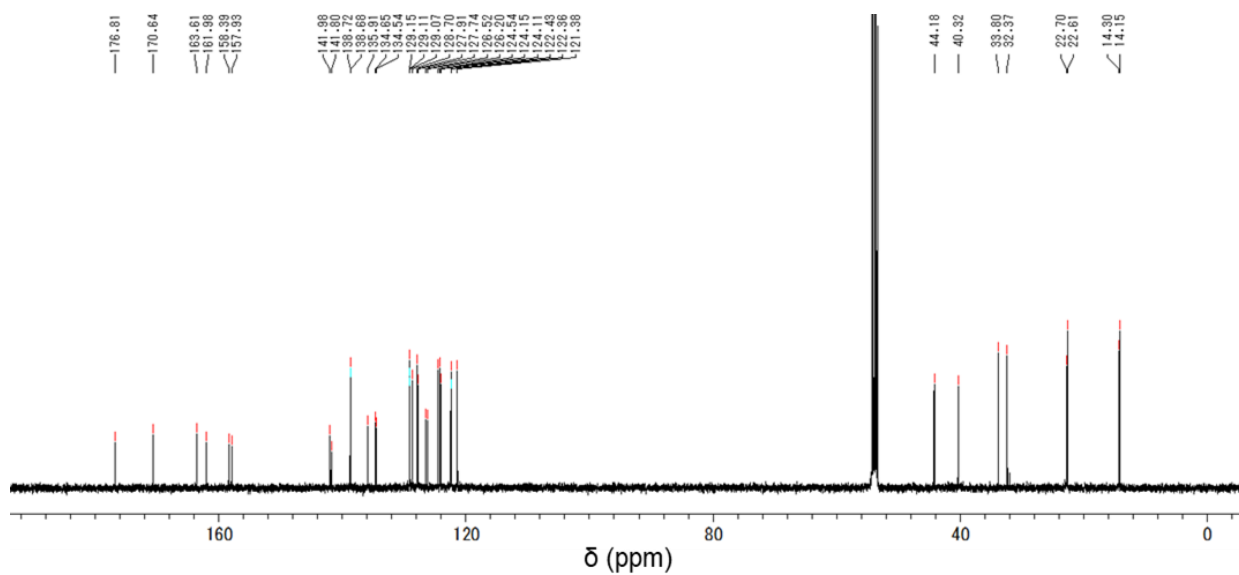

**Figure S15.**  $^{13}\text{C}$  NMR spectrum of  $[\text{Ir}(\text{2-Bubzq})_2(\text{CO})\text{Cl}]$  in  $\text{CD}_2\text{Cl}_2$  (126 MHz, 27 °C).

[ Mass Spectrum ]  
 Data : Ir-Co001 Date : 03-Jul-2019 08:46  
 Instrument : MS700D  
 Sample : Ir-Co  
 Note : Matrix:3NBA  
 Inlet : Direct Ion Mode : FAB+  
 Spectrum Type : Normal Ion [MF-Linear]  
 RT : 0.14 min Scan# : (2,15) Temp : 3276.7 deg.C  
 BP : m/z 661.3717 Int. : 3264.82 (34234080)  
 Output m/z range : 50 to 903 Cut Level : 0.00 %

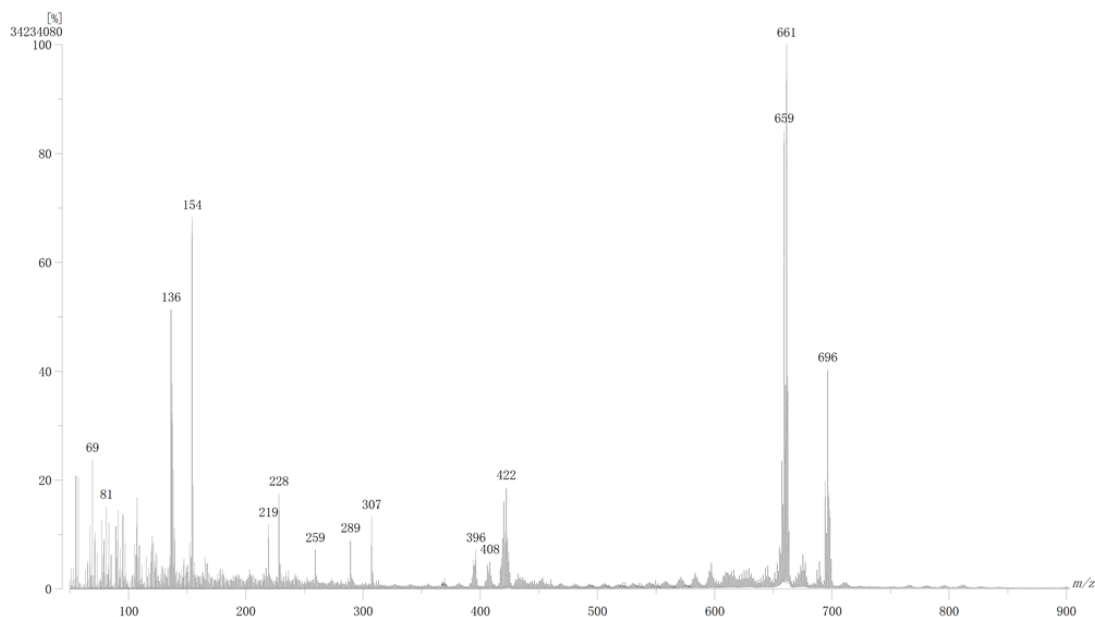

**Figure S16.** LRMS spectrum of  $[\text{Ir}(\text{2-Bubzq})_2(\text{CO})\text{Cl}]$  ( $\text{FAB}^+$ , 3-nitrobenzyl alcohol (3-NBA) as a matrix).

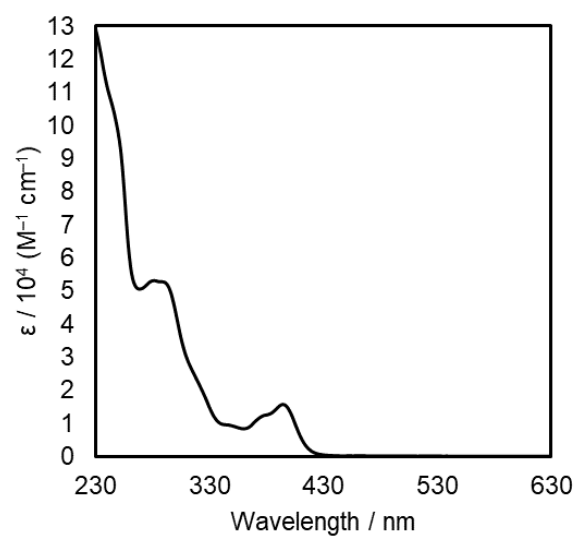

**Figure S17.** UV-vis spectrum of [Ir(2-Bubzq)<sub>2</sub>(CO)Cl] in CH<sub>2</sub>Cl<sub>2</sub>.

## 8.2 Reaction of [Ir(bzq)<sub>2</sub>Cl]<sub>2</sub> with carbon monoxide

A solution of [Ir(bzq)<sub>2</sub>Cl]<sub>2</sub> in CH<sub>2</sub>Cl<sub>2</sub> (7.2 μmol) was bubbled by CO for 1 hour. After removal of volatile materials by evaporation under reduced pressure, the residue was analysed by <sup>1</sup>H NMR. The integrated ratio of the <sup>1</sup>H NMR spectrum showed that 60% of [Ir(bzq)<sub>2</sub>Cl]<sub>2</sub> reacted with CO and afforded a new complex. After CO bubbling another 4h, the reaction was completed and [Ir(bzq)<sub>2</sub>(CO)Cl] was obtained as a white solid (13.7 μmol, Yield 95%). These results are in agreement with the previous report that [Ir(ppy)<sub>2</sub>Cl]<sub>2</sub> (ppyH = 2-phenylpyridine), an analog of [Ir(bzq)<sub>2</sub>Cl]<sub>2</sub>, reacts with CO 5 h to give the carbonyl complex [Ir(ppy)<sub>2</sub>(CO)Cl] quantitatively.<sup>S3</sup> <sup>1</sup>H NMR (400 MHz; CDCl<sub>3</sub>) 5.93 (1H, d, *J* = 7.5 Hz), 6.35 (1H, d, *J* = 7.5 Hz), 7.06 (1H, dd, *J* = 5.0, 7.5 Hz), 7.08 (1H, dd, *J* = 5.0, 7.5 Hz), 7.38 (1H, d, *J* = 8.0 Hz), 7.41 (1H, d, *J* = 8.0 Hz), 7.64 (1H, d, *J* = 5.0 Hz), 7.66 (1H, d, *J* = 5.0 Hz), 7.72 (1H, d, *J* = 9.0 Hz), 7.77 (1H, d, *J* = 8.0 Hz), 7.78 (1H, d, *J* = 8.0 Hz), 7.81 (1H, d, *J* = 9.0 Hz), 8.43 (1H, d, *J* = 8.0 Hz), 8.47 (1H, d, *J* = 8.0 Hz), 9.49 (1H, d, *J* = 5.0 Hz), 10.12 (1H, d, *J* = 5.0 Hz); <sup>13</sup>C NMR (126 Hz, CDCl<sub>3</sub>) 121.29, 121.96, 122.19, 122.79, 123.26, 123.69, 127.49, 127.66, 128.16, 128.45, 129.70, 129.94 (2C), 130.60, 134.22, 134.41, 136.87, 137.31, 137.54, 140.26, 140.84, 150.65, 151.75, 157.13, 157.29, 162.00, 172.94; LRMS(FAB<sup>+</sup>, 3-NBA), *m/z* = 613 (M+1).

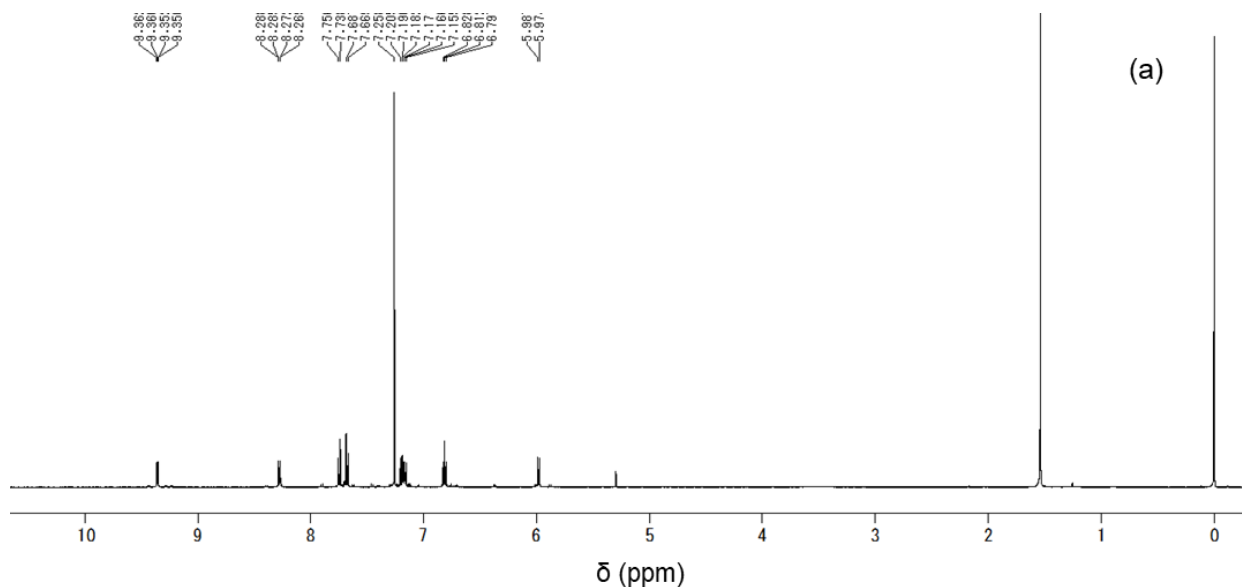

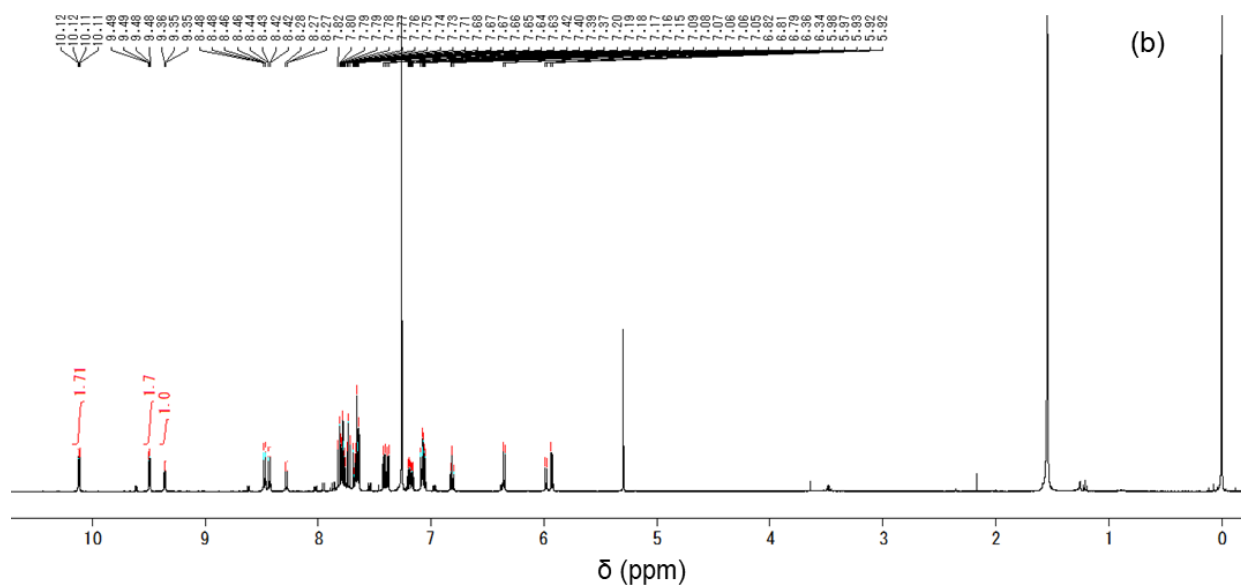

**Figure S18.** <sup>1</sup>H NMR spectra of (a) [Ir(bzq)<sub>2</sub>Cl]<sub>2</sub> and (b) the residue of the reaction between [Ir(bzq)<sub>2</sub>Cl]<sub>2</sub> and carbon monoxide in CDCl<sub>3</sub> (500 MHz, 27 °C).

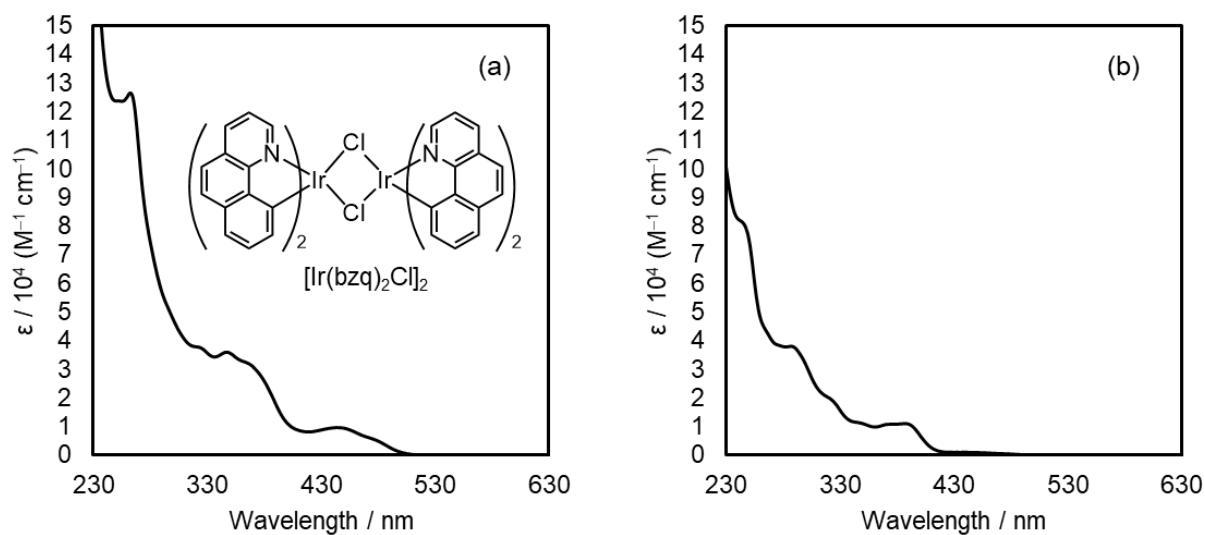

**Figure S19.** UV-vis spectra of (a) [Ir(bzq)<sub>2</sub>Cl]<sub>2</sub> and (b) the residue of the reaction between [Ir(bzq)<sub>2</sub>Cl]<sub>2</sub> and carbon monoxide in CH<sub>2</sub>Cl<sub>2</sub>.

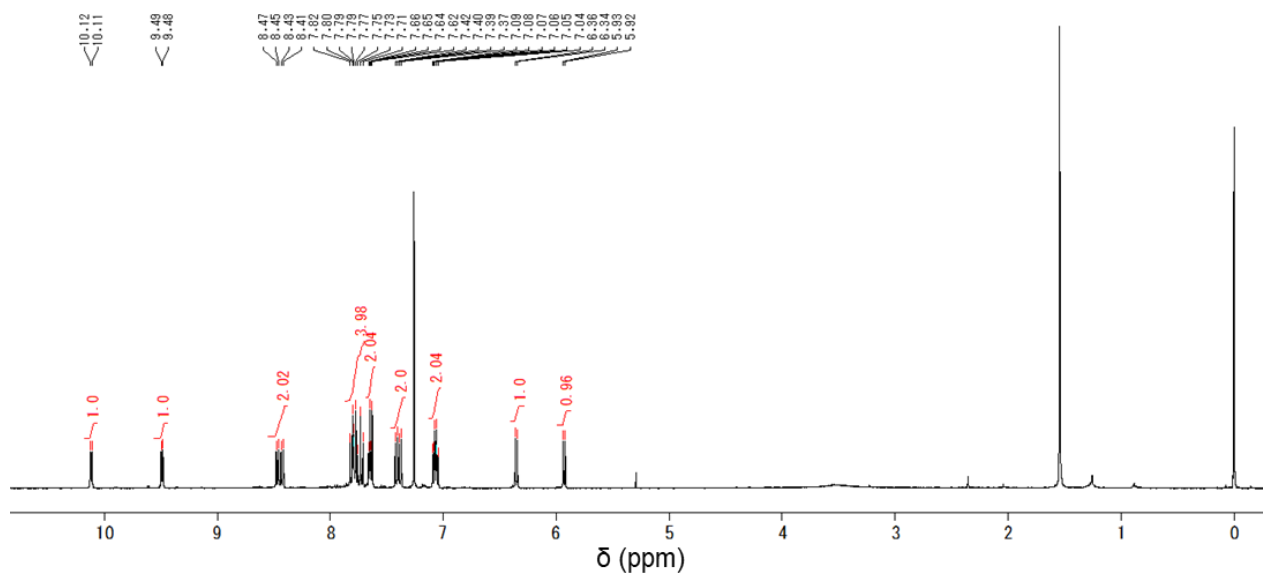

**Figure S20.**  $^1\text{H}$  NMR spectrum of  $[\text{Ir}(\text{bzq})_2(\text{CO})\text{Cl}]$  in  $\text{CDCl}_3$  (400 MHz, 27 °C).

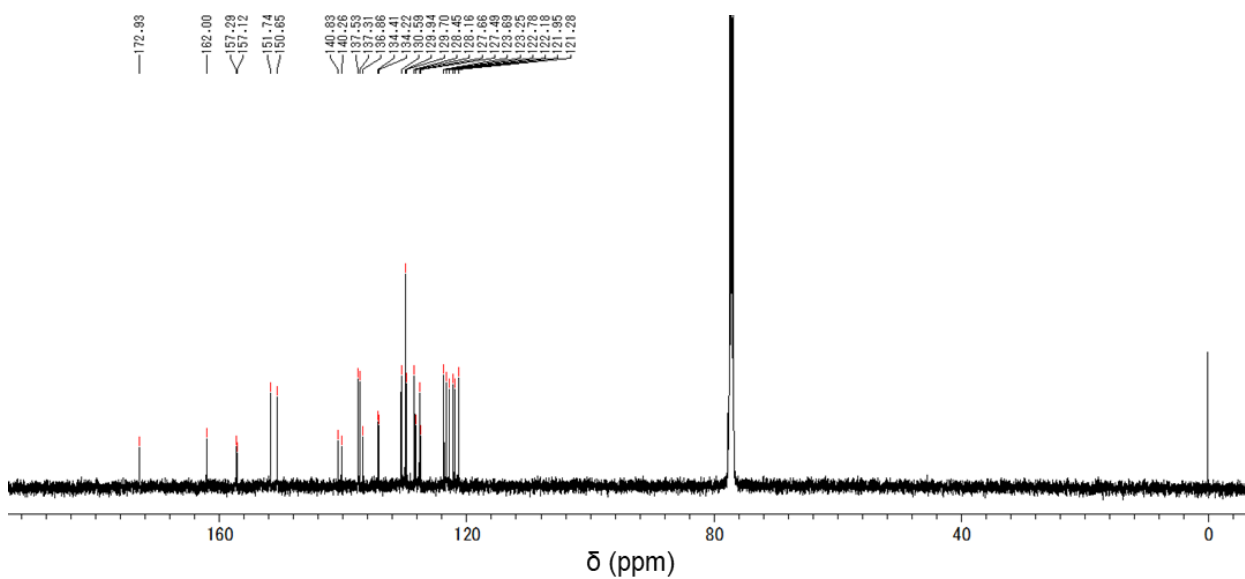

**Figure S21.**  $^{13}\text{C}$  NMR spectrum of  $[\text{Ir}(\text{bzq})_2(\text{CO})\text{Cl}]$  in  $\text{CDCl}_3$  (126 MHz, 27 °C).

[ Mass Spectrum ]  
Data : takimoto006 Date : 14-Jul-2021 15:26  
Instrument : MS700D  
Sample : Ir bzq CO  
Note : Matrix:NBA  
Inlet : Direct Ion Mode : FAB+  
Spectrum Type : Normal Ion [MF-Linear]  
RT : 0.00 min Scan# : (1,22) Temp : 3276.7 deg.C  
BP : m/z 154.2311 Int. : 35193.44 (369029584)  
Output m/z range : 50 to 2000 Cut Level : 0.00 %

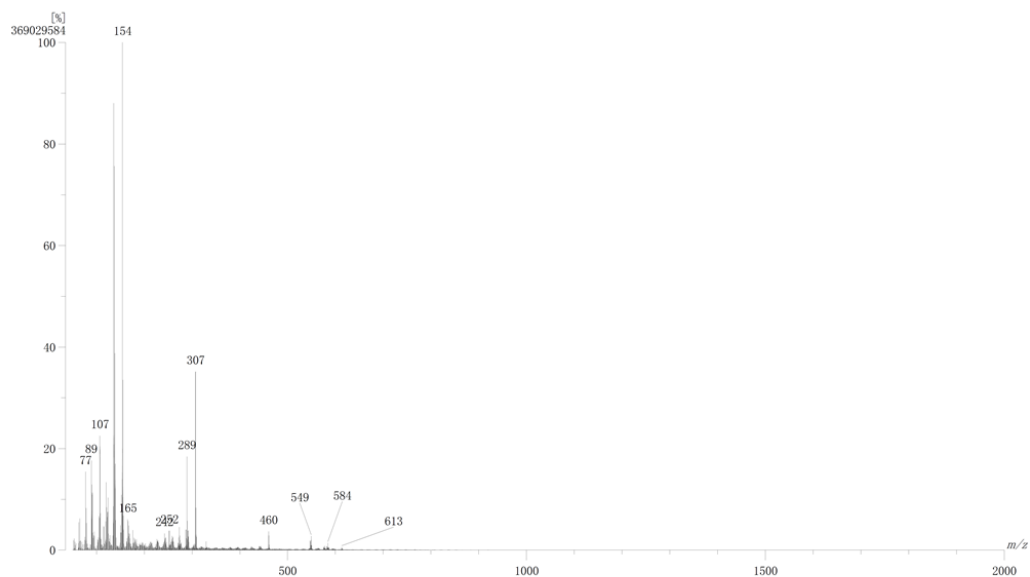

**Figure S22.** LRMS spectrum of  $[\text{Ir}(\text{bzq})_2(\text{CO})\text{Cl}]$  ( $\text{FAB}^+$ , 3-nitrobenzyl alcohol (3-NBA) as a matrix).

### 8.3 X-Ray analysis of $[\text{Ir}(\text{2-Bubzq})_2(\text{CO})\text{Cl}]$

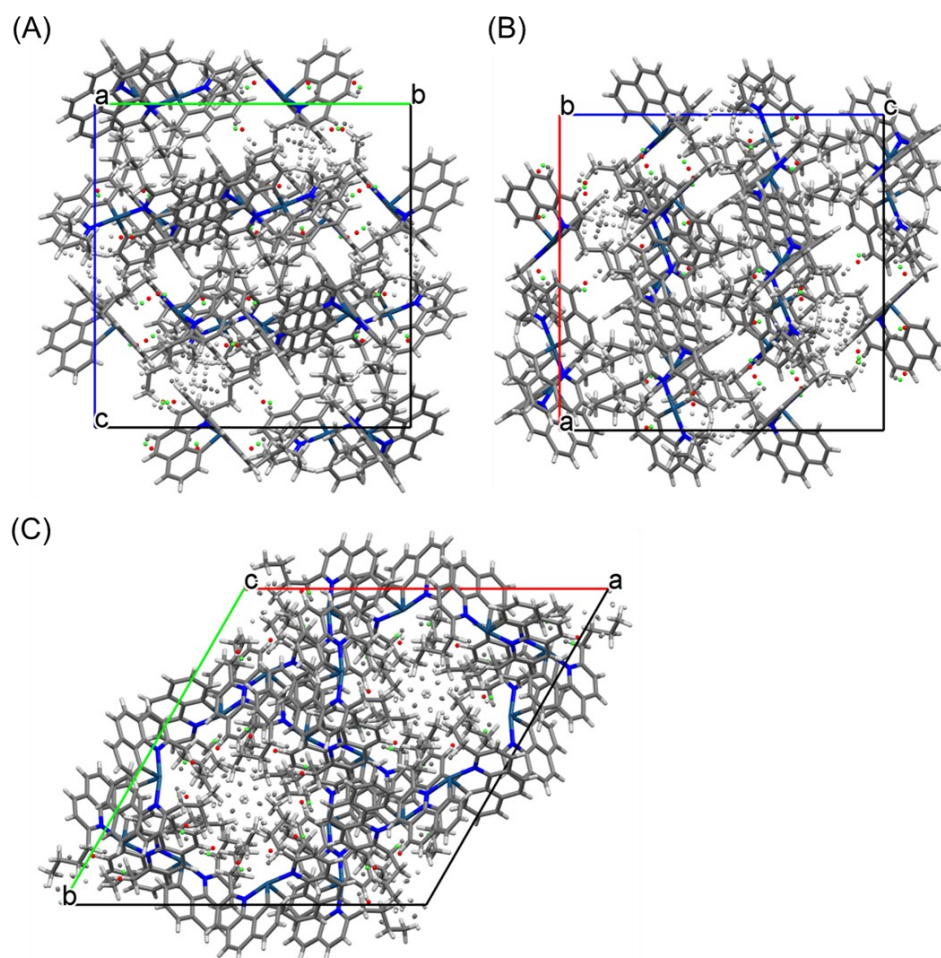

**Figure S23.** Crystal structures of  $[\text{Ir}(\text{2-Bubzq})_2(\text{CO})\text{Cl}]$  viewed along (A) the  $a$  axis, (B) the  $b$  axis, and (C) the  $c$  axis, respectively.

**Table S5.** Structure information of [Ir(2-Bubzq)<sub>2</sub>(CO)Cl].

| Compound                                                                   | [Ir(2-Bubzq) <sub>2</sub> (CO)Cl]                    |
|----------------------------------------------------------------------------|------------------------------------------------------|
| Recrystallization solvent                                                  | Dichloromethane/ <i>n</i> -Hexane                    |
| Formula                                                                    | C <sub>35</sub> H <sub>32</sub> IrN <sub>2</sub> OCl |
| FW                                                                         | 724.27                                               |
| Crystal system                                                             | Trigonal                                             |
| Space group                                                                | <i>R</i> -3                                          |
| <i>a</i> [Å]                                                               | 26.0164 (6)                                          |
| <i>b</i> [Å]                                                               | 26.0164 (6)                                          |
| <i>c</i> [Å]                                                               | 23.1213 (4)                                          |
| $\alpha$ [deg]                                                             | 90                                                   |
| $\beta$ [deg]                                                              | 90                                                   |
| $\gamma$ [deg]                                                             | 120                                                  |
| <i>V</i> [Å <sup>3</sup> ]                                                 | 13553.1 (7)                                          |
| <i>Z</i>                                                                   | 18                                                   |
| $\mu$ [mm <sup>-1</sup> ]                                                  | 4.552                                                |
| Crystal size                                                               | 0.07 × 0.07 × 0.06                                   |
| $R[F^2 > 2\sigma(F^2)]$ , $wR(F^2)$ , <i>S</i>                             | 0.051, 0.108, 1.07                                   |
| $wR_2$                                                                     | 0.108 (all data)                                     |
| No. of measured, independent and observed [ $I > 2\sigma(I)$ ] reflections | 29087, 7270, 6174                                    |
| No. of parameters                                                          | 417                                                  |
| CCDC No.                                                                   | 2071813                                              |



#### 8.4 ECD spectra of $[\text{Ir}(\text{2-Bubzq})_2(\text{CO})\text{Cl}]$

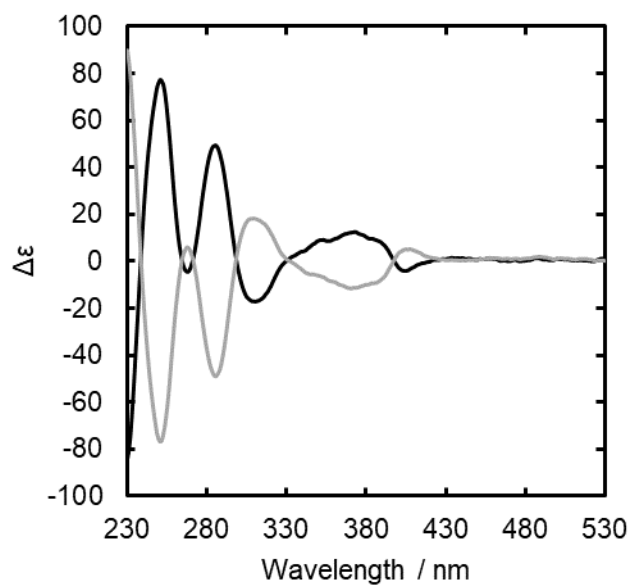

**Figure S24.** The ECD spectra of  $[\text{Ir}(\text{2-Bubzq})_2(\text{CO})\text{Cl}]$  in dichloromethane. The solid and grey lines correspond to the CO adducts of  $\Lambda$ - and  $\Delta$ - $[\text{Ir}(\text{2-Bubzq})_2\text{Cl}]$ , respectively.

## 9. Reaction with 1,10-phenanthroline

### 9.1 Reaction of racemic [Ir(2-Bubzq)<sub>2</sub>Cl] with 1,10-phenanthroline

[Ir(2-Bubzq)<sub>2</sub>Cl] (15.9 μmol) and 1,10-phenanthroline (phen) (17.2 μmol) were dissolved in 2 mL of dichloromethane. After removal of volatile materials by evaporation under reduced pressure, the residue was washed by *n*-hexane to remove the unreacted phen. The product was obtained as a yellow solid (15.9 μmol, Yield 100%). <sup>1</sup>H NMR (500 MHz; CD<sub>3</sub>OD) 0.22 (2H, m, H13a), 0.42 (6H, t, *J* = 7.5 Hz, H14), 0.50 (2H, m, H12a), 0.59 (2H, m, H13b), 1.13 (2H, m, H12b), 1.80 (2H, m, H11a), 2.61 (2H, m, H11b), 6.48 (2H, d, *J* = 7.5 Hz, H9), 7.16 (2H, t, *J* = 7.5 Hz, H8), 7.35 (2H, d, *J* = 8.5 Hz, H3), 7.59 (2H, d, *J* = 7.5 Hz, H7), 7.67 (2H, dd, *J* = 5.5, 8.5 Hz, H2'), 7.79 (2H, d, *J* = 9.0 Hz, H5), 7.93 (2H, dd, *J* = 1.5, 5.5 Hz, H1'), 7.95 (2H, d, *J* = 9.0 Hz, H6), 8.28 (2H, s, H4'), 8.33 (2H, d, *J* = 8.5 Hz, H4), 8.69 (2H, d, *J* = 1.5, 8.5 Hz, H3'); <sup>13</sup>C NMR (126 Hz, CD<sub>3</sub>OD) 13.86, 23.26, 32.90, 39.17, 121.98, 122.64, 125.34, 127.41, 127.80, 129.50, 130.00, 130.05, 131.45, 132.75, 136.41, 139.61, 139.67, 143.75, 145.10, 148.80, 150.86, 159.02, 167.09; LRMS(FAB<sup>+</sup>, 3-NBA), *m/z* = 841 (M-Cl).

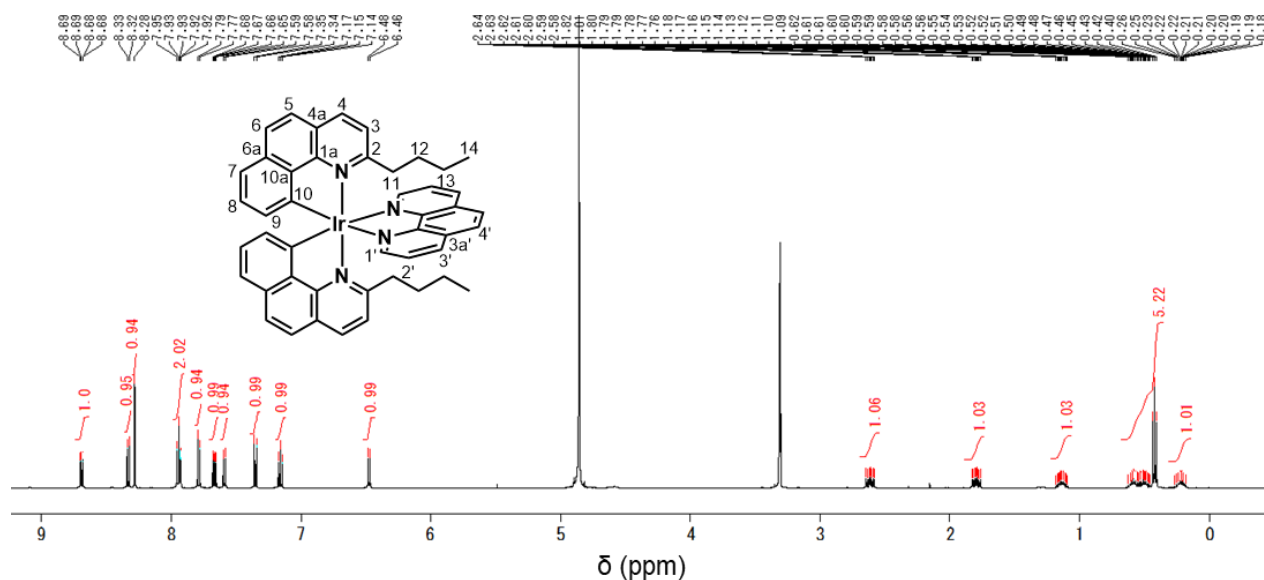

**Figure S25.** <sup>1</sup>H NMR spectrum of [Ir(2-Bubzq)<sub>2</sub>(phen)]Cl in CD<sub>3</sub>OD (500 MHz, 27 °C).

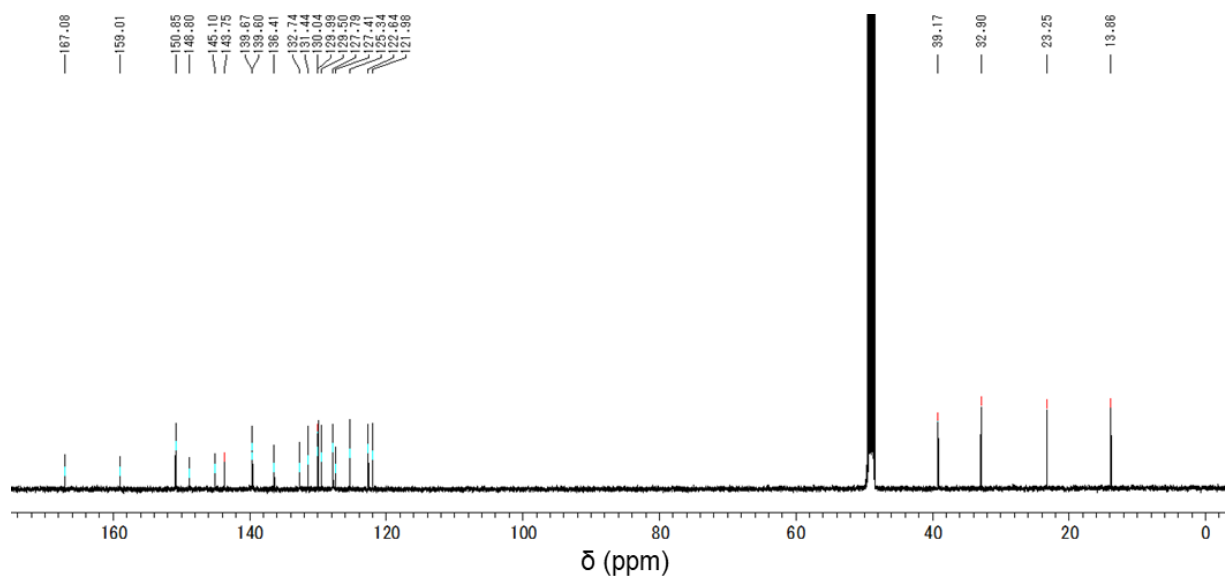

**Figure S26.**  $^{13}\text{C}$  NMR spectrum of  $[\text{Ir}(\text{2-Bubzq})_2(\text{phen})]\text{Cl}$  in  $\text{CD}_3\text{OD}$  (126 MHz, 27 °C).

[ Mass Spectrum ]  
 Data : 20210526001 Date : 26-May-2021 09:37  
 Instrument : MS700D  
 Sample : Ir-Bubzq phen  
 Note : Matrix:NBA  
 Inlet : Direct Ion Mode : FAB+  
 Spectrum Type : Normal Ion [MF-Linear]  
 RT : 0.60 min Scan# : (5,8) Temp : 3276.7 deg.C  
 BP : m/z 841.1522 Int. : 2009.59 (21072064)  
 Output m/z range : 50 to 1028 Cut Level : 0.00 %

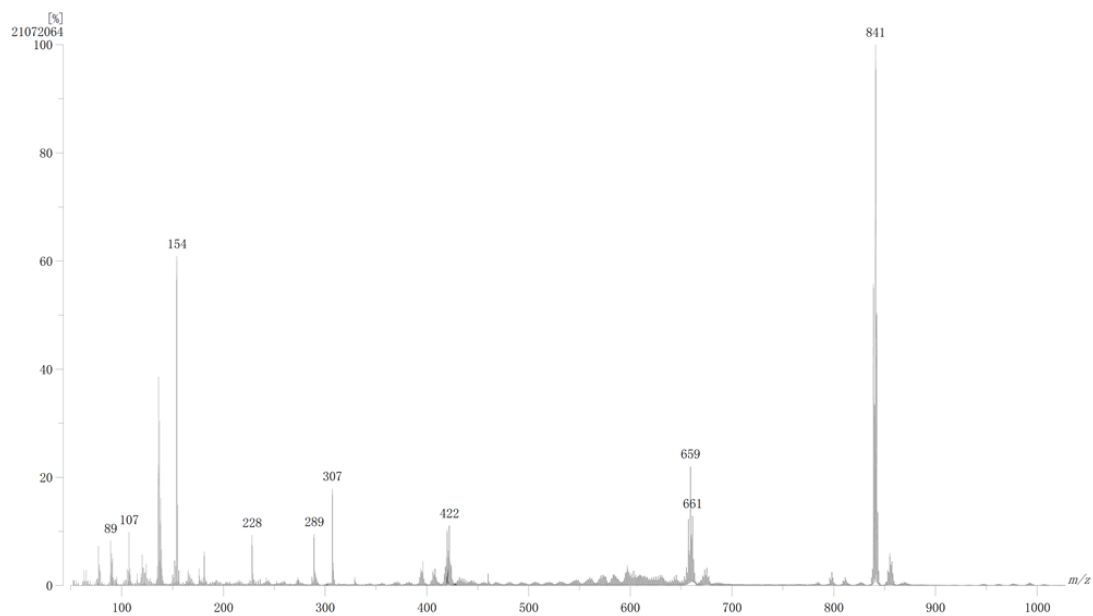

**Figure S27.** LRMS spectrum of  $[\text{Ir}(\text{2-Bubzq})_2(\text{phen})]\text{Cl}$  ( $\text{FAB}^+$ , 3-nitrobenzyl alcohol (3-NBA) as a matrix).

## 9.2 X-Ray analysis of racemic $[\text{Ir}(2\text{-Bubzq})_2(\text{phen})]\text{Cl}$

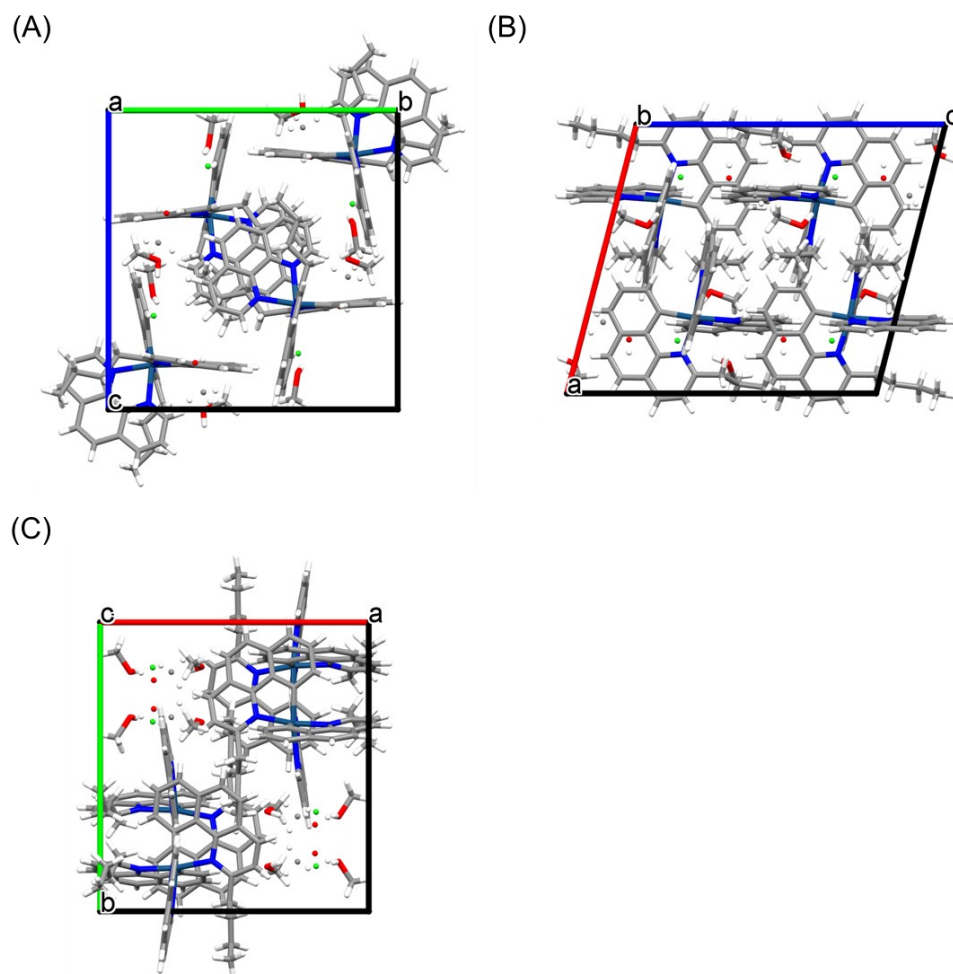

**Figure S28.** Crystal structures of  $[\text{Ir}(2\text{-Bubzq})_2(\text{phen})]\text{Cl}$  viewed along (A) the *a* axis, (B) the *b* axis, and (C) the *c* axis, respectively.

**Table S6.** Structure information of racemic [Ir(2-Bubzq)<sub>2</sub>(phen)]Cl.

| Compound                                                                   | [Ir(2-Bubzq) <sub>2</sub> (phen)]Cl                                                                                       |
|----------------------------------------------------------------------------|---------------------------------------------------------------------------------------------------------------------------|
| Recrystallization solvent                                                  | Methanol/diethyl ether                                                                                                    |
| Formula                                                                    | C <sub>46</sub> H <sub>40</sub> IrN <sub>4</sub> Cl, 1.31(MeOH),<br>C <sub>0.69</sub> H <sub>3.07</sub> O <sub>0.69</sub> |
| FW                                                                         | 940.89                                                                                                                    |
| Crystal system                                                             | Monoclinic                                                                                                                |
| Space group                                                                | <i>P</i> 2 <sub>1</sub> / <i>c</i>                                                                                        |
| <i>a</i> [Å]                                                               | 15.3729 (4)                                                                                                               |
| <i>b</i> [Å]                                                               | 16.0231 (3)                                                                                                               |
| <i>c</i> [Å]                                                               | 17.1143 (4)                                                                                                               |
| $\alpha$ [deg]                                                             | 90                                                                                                                        |
| $\beta$ [deg]                                                              | 104.488 (3)                                                                                                               |
| $\gamma$ [deg]                                                             | 90                                                                                                                        |
| <i>V</i> [Å <sup>3</sup> ]                                                 | 4081.56 (17)                                                                                                              |
| <i>Z</i>                                                                   | 4                                                                                                                         |
| $\mu$ [mm <sup>-1</sup> ]                                                  | 3.381                                                                                                                     |
| Crystal size                                                               | 0.1 × 0.08 × 0.02                                                                                                         |
| $R[F^2 > 2\sigma(F^2)]$ , $wR(F^2)$ , <i>S</i>                             | 0.044, 0.080, 1.10                                                                                                        |
| $wR_2$                                                                     | 0.080 (all data)                                                                                                          |
| No. of measured, independent and observed [ $I > 2\sigma(I)$ ] reflections | 68718, 9849, 8091                                                                                                         |
| No. of parameters                                                          | 532                                                                                                                       |
| CCDC No.                                                                   | 2099501                                                                                                                   |

### 9.3 Comparison of the ECD spectra of $\Lambda$ -[Ir(2-Bubzq)<sub>2</sub>(phen)]Cl and $\Lambda$ -[Ir(bzq)<sub>2</sub>(phen)]ClO<sub>4</sub>

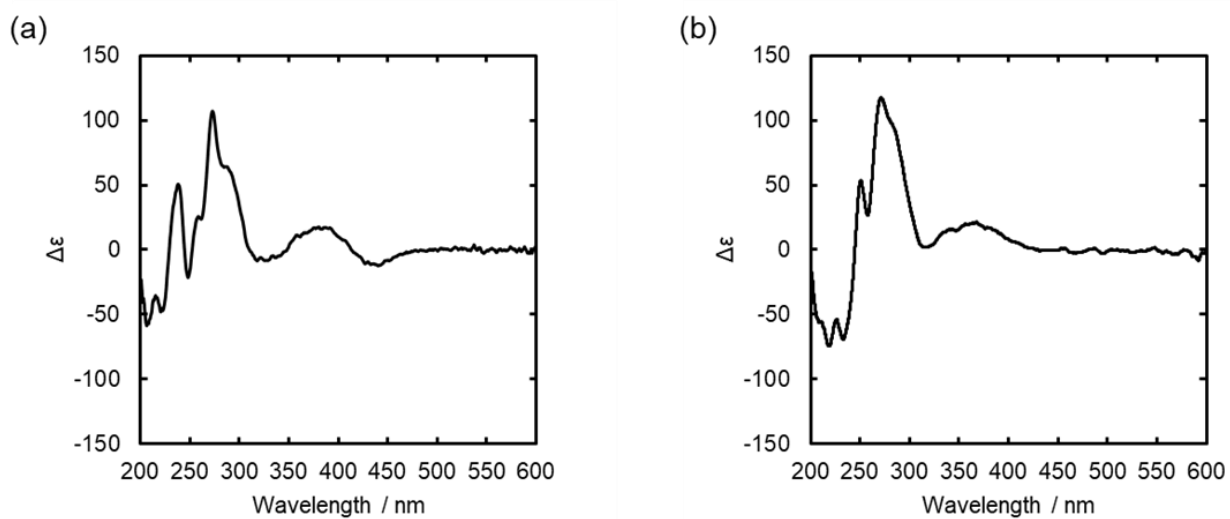

**Figure S29.** The ECD spectra of (a)  $\Lambda$ -[Ir(2-Bubzq)<sub>2</sub>(phen)]Cl and (b)  $\Lambda$ -[Ir(bzq)<sub>2</sub>(phen)]ClO<sub>4</sub><sup>S4</sup> in methanol.

## 10. References

- (S1) A. W. Addison, T. N. Rao, J. Reedijk, J. V. Rijn, G. C. Verschoor *J. Chem. Soc., Dalton Trans.* **1984**, 1349.
- (S2) M. J. Auburn, R. D. Holmes-Smith, S. R. Stobart, P. K. Bakshi, T. S. Cameron *Organometallics* **1996**, *15*, 13, 3032.
- (S3) W. J. Finkenzeller, P. Stöbel, H. Yersin, *Chem. Phys. Lett.* **2004**, *397*, 289.
- (S4) K. Takimoto, K. Tamura, Y. Watanabe, A. Yamagishi and H. Sato, *New J. Chem.* **2018**, *42*, 4818.
